# Supplementary material for: Migrasomal autophagosomes relieve endoplasmic reticulum stress in glioblastoma cells
Source: Springer Nature journal article supplement (doi:10.1186/s12915-024-01829-w), 2024-01-30
Supplement: 12915_2024_1829_MOESM1_ESM.pdf [file 12915_2024_1829_MOESM1_ESM.pdf]

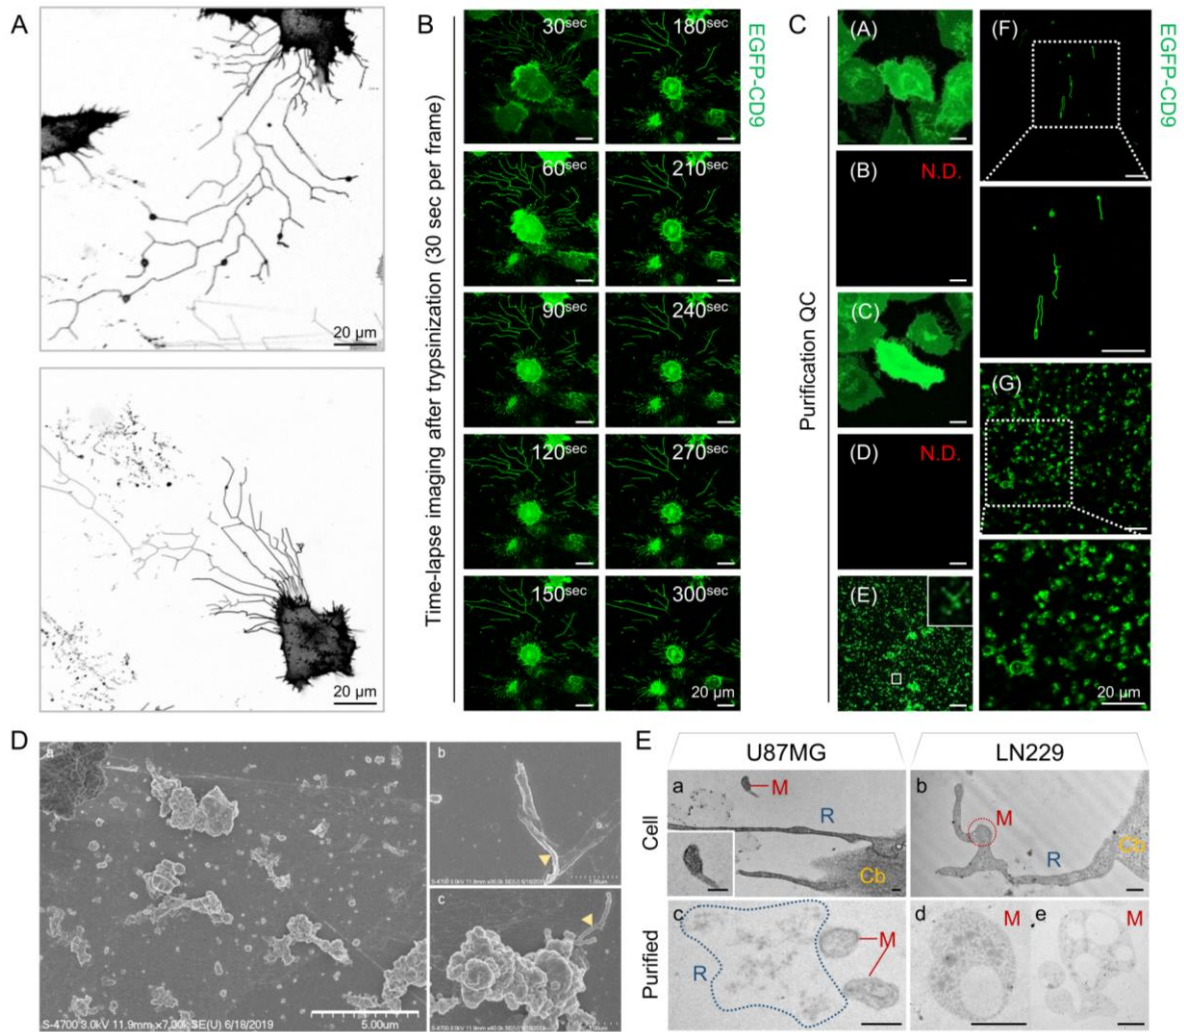

1  
2 **Fig. S1.** Retraction fiber & migrasome (R&M) of glioblastoma cells and quality control of  
3 purified R&Ms. **A** LN229 cell expressing EGFP-CD9 produced R&Ms (upper panel) and  
4 produced few migrasomes (lower panel). Gray, EGFP-CD9. Scale bar, 20  $\mu$ m. **B** Time-lapsed  
5 live-cell imaging (captured in every 30 sec) of U87MG EGFP-CD9 cells after treatment of  
6 0.015% trypsin/EDTA. Green, EGFP-CD9. Scale bars, 20  $\mu$ m. **C** Quality control of the R&M  
7 purification stages in Fig. 1A. Each quality control sample were obtained and observed  
8 immediately. The samples designated in each image (“A” ~ “E”) are paralleled samples  
9 described in R&M purification stages of Fig. 1A. The image “F” represents the debris obtained  
10 after trypsinization procedure and the image “G” represents the purified R&M obtained by  
11 using Exosome Purification Reagent. Green, EGFP-CD9. Scale bars, 20  $\mu$ m. **D** Scanning

12 electron microscope images of purified R&M. From “a” to “f”, irregular and atypical purified  
13 R&M samples are shown. Yellow arrows represent the retraction fiber-like structures. Scale  
14 bars are indicated in each figure. **E** Transmission electron microscope images of attached cells  
15 and purified R&M. From “a” to “e”, transmission electron microscope imaging of attached  
16 cells and purified U87MG-R&M and LN229-R&M were presented. R, retraction fiber; M,  
17 migrasome; Cb, Cell body. Scale bars, 200  $\mu\text{m}$ .

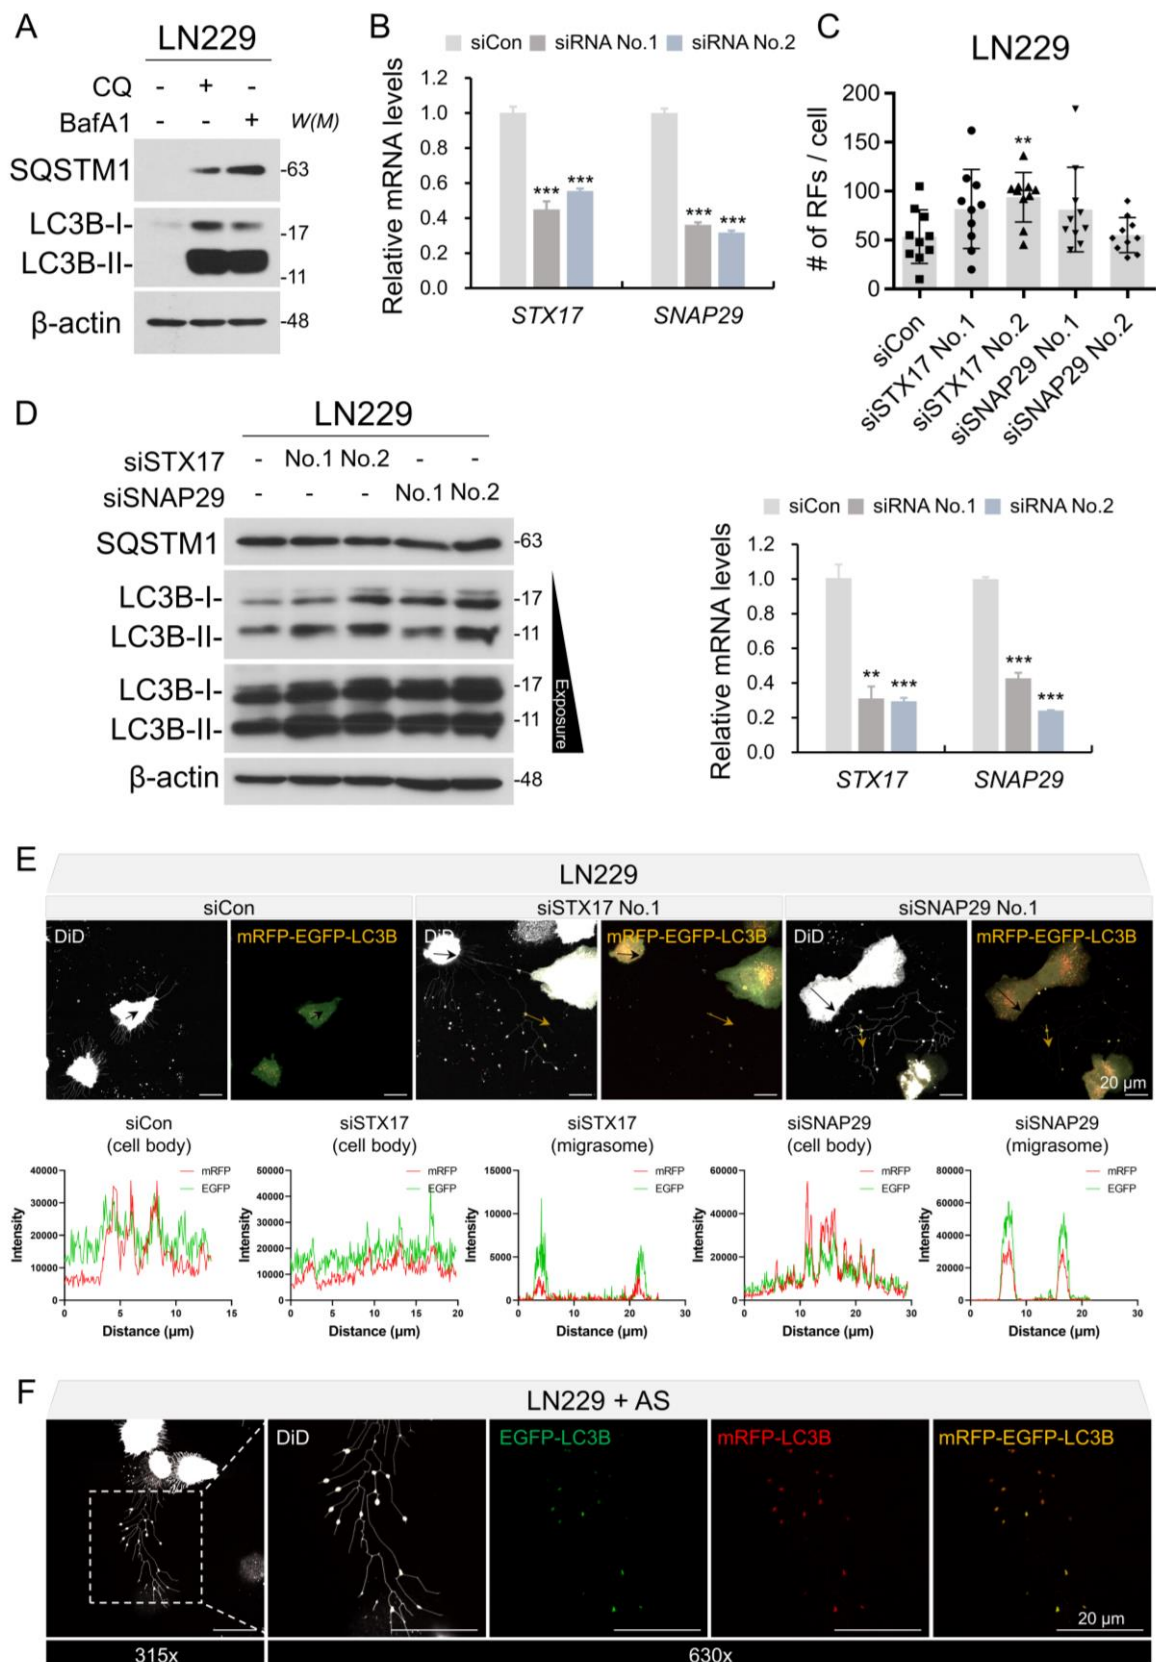

19 **Fig. S2.** Inhibition of autophagosome/lysosome fusion by chemical drugs and genetic ablation.  
20 **A** Western blotting of SQSTM1, LC3B, and  $\beta$ -actin proteins in and LN229 cells. Cells were  
21 treated with chloroquine (CQ; 50  $\mu$ M, 12 h) or bafilomycin A1 (BafA1; 50 nM, 12 h).  $W(M)$ ,  
22 molecular weight. **B** qRT-PCR experiment for quantify mRNA levels of *STX17* and *SNAP29*  
23 in LN229 cells transfected with *STX17* or *SNAP29* siRNAs. \*\*\* indicates  $p < 0.001$ . Data are  
24 expressed as mean  $\pm$  SEM. Student's t-test was used to analyze the statistical significance  
25 between each group ( $n = 3$ ). **C** Quantification of the number of RFs per a cell. Image analyses  
26 were performed using results from Fig. 3H. \*\* indicates  $p < 0.01$ . Data are expressed as mean  
27  $\pm$  SEM. The unpaired nonparametric Mann-Whitney U test was used to analyze the statistical  
28 significance between each group ( $n = 10$ ). **D** Western blotting of SQSTM1, LC3B, and  $\beta$ -actin  
29 proteins in and LN229 cells with siSTX17 or siSNAP29 (left panel). qRT-PCR experiment set  
30 of cells used in Western blotting for quantify mRNA levels of *STX17* and *SNAP29*. \*\* indicates  
31  $p < 0.01$ . \*\*\* indicates  $p < 0.001$  (right panel). Data are expressed as mean  $\pm$  SEM. Student's  
32 t-test was used to analyze the statistical significance between each group ( $n = 3$ ). **E** Tandem-  
33 fluorescent LC3B expressed in LN229 cells were used for performing knockdown of *STX17*  
34 and *SNAP29*. GFP<sup>-</sup>/RFP<sup>+</sup> vesicles represent autolysosomes and GFP<sup>+</sup>/RFP<sup>+</sup> vesicles represent  
35 autophagosomes (upper panel). Scale bars, 20  $\mu$ m. Colocalization analysis was performed for  
36 investigating colocalized pattern of GFP and RFP (lower panel). **F** Tandem-fluorescent LC3B  
37 was expressed in LN229 cell. Live-cell imaging performed in NaAsO<sub>2</sub> (AS; 10  $\mu$ M, 12 h)  
38 treatment condition. Scale bars, 20  $\mu$ m.

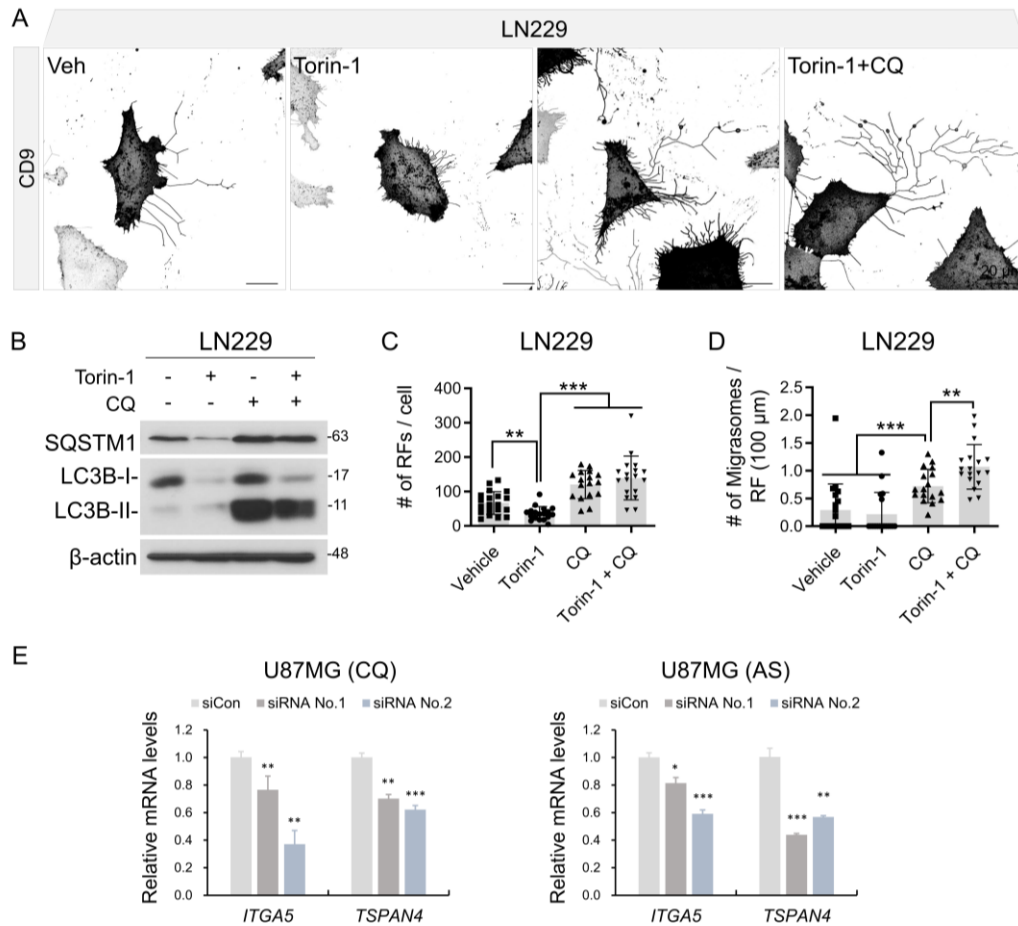

39

40 **Fig. S3.** Reinforcement of autophagy under the disturbed autophagic flux induces R&M  
 41 formation. **A** Live-cell imaging of LN229 cells. Cells were treated with Torin-1 (250 nM, 2 h)  
 42 and/or chloroquine (CQ; 50 μM, 12 h). The number of cells imaged for quantifying retraction  
 43 fibers (RFs) and migrasomes are as follows: n = 20 for DMSO, n = 18 for Torin-1, n = 17 for  
 44 CQ, and n = 18 for Torin-1/CQ. Scale bars, 20 μm. **B** Western blotting of SQSTM1, LC3B,  
 45 and β-actin under treatment with Torin-1 and/or CQ. **C** Quantification of the number of RFs  
 46 per a cell. Image analyses were performed using results from Fig. S3A. **D** Quantification of the  
 47 number of migrasomes per RF (100 μm). Image analyses were performed using the results  
 48 from Fig. S3A. **E** qRT-PCR experiment set of cells used in Fig. 5 and 6 for determining the  
 49 knockdown efficiency of both *ITGA5* and *TSPAN4*. \* indicates p < 0.05. \*\* indicates p < 0.01.  
 50 \*\*\* indicates p < 0.001 (n = 3).

A Uncropped blots (Fig. 2C)

Integrin  $\alpha 5$

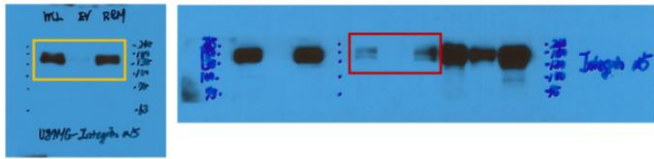

SQSTM1 (p62)

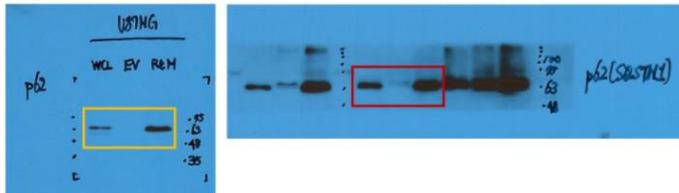

LC3B

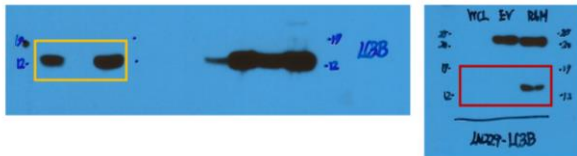

51

CD63

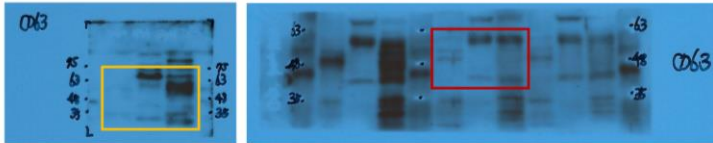

$\alpha$ -tubulin

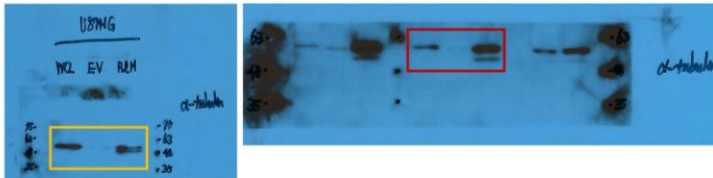

RPL4

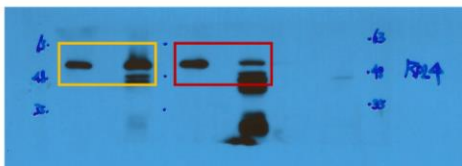

RPS13

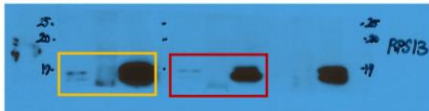

GAPDH

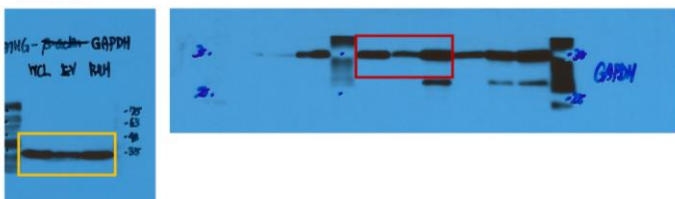

52

B Uncropped blots (Fig. 4C)

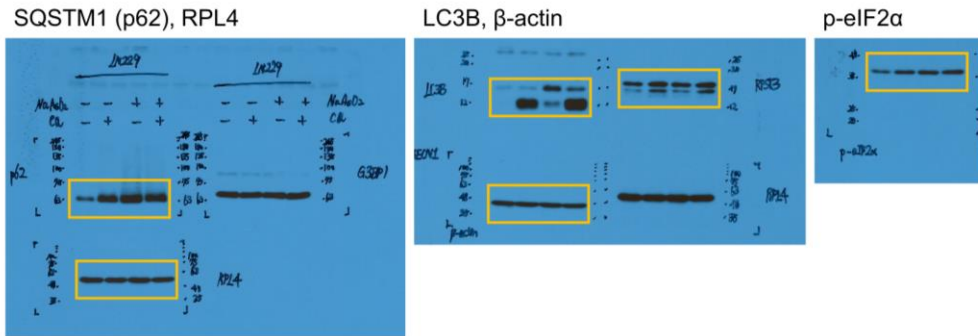

C Uncropped blots (Fig. S2A)

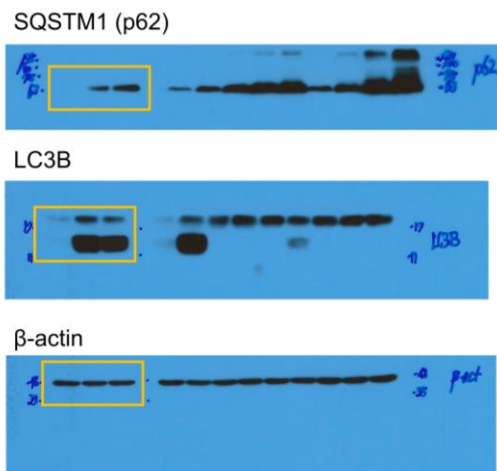

53

D Uncropped blots (Fig. S2D)

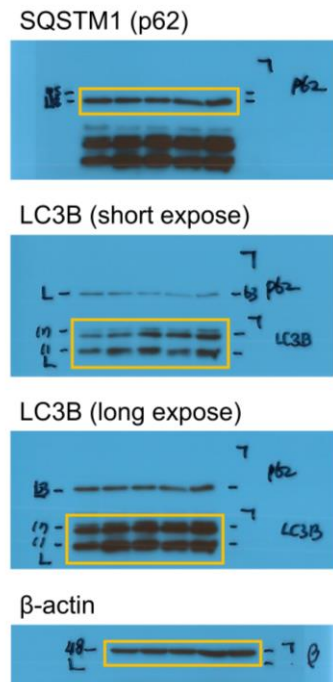

E Uncropped blots (Fig. S3B)

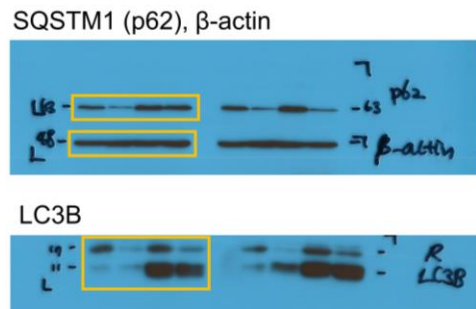

54

55 **Fig. S4.** Uncropped blots for Western blot experiments. **A** Uncropped blots of Fig. 2C. Western  
56 blotting was conducted by immunoblotting against the following antibodies: integrin  $\alpha 5$ ,  
57 SQSTM1 (p62), LC3B,  $\alpha$ -tubulin, RPL4, RPS13, and GAPDH. **B** Uncropped blots of Fig. 4C.  
58 Western blotting was performed by immunoblotting against the following antibodies:  
59 SQSTM1 (p62), LC3B, p-eIF2 $\alpha$  (Ser51), and  $\beta$ -actin. **C** Uncropped blots of Fig. S2A. Western  
60 blotting was conducted by immunoblotting against the following antibodies: SQSTM1 (p62),  
61 LC3B, and  $\beta$ -actin. **D** Uncropped blot images of Fig. S2D. Western experiments was performed  
62 by using the following antibodies: SQSTM1 (p62), LC3B, and  $\beta$ -actin. **E** Uncropped blot  
63 images of Fig. S3B. Western blotting was performed by using the following antibodies:  
64 SQSTM1 (p62), LC3B, and  $\beta$ -actin.

| Gene          | Species             | Direction | Sequence (5'-3')       |
|---------------|---------------------|-----------|------------------------|
| 18S rRNA      | <i>Homo Sapiens</i> | Forward   | CAGCCACCCGAGATTGAGCA   |
|               |                     | Reverse   | TAGTAGCGACGGGCGGTGTG   |
| <i>ITGA5</i>  | <i>Homo Sapiens</i> | Forward   | AGCAAGAGCCGGATAGAGGA   |
|               |                     | Reverse   | TCAGGGCATTCTTGTCACCC   |
| <i>TSPAN4</i> | <i>Homo Sapiens</i> | Forward   | TGGGTGCCATCAAGGAGAAC   |
|               |                     | Reverse   | CTTGTCCGTGTAGGCGAAGA   |
| <i>STX17</i>  | <i>Homo Sapiens</i> | Forward   | GGGGAATGGTGTGGTGCTAA   |
|               |                     | Reverse   | TAGACATGCAGTTGGGCTGG   |
| <i>SNAP29</i> | <i>Homo Sapiens</i> | Forward   | CTGGCCCTCATGTACGAGTC   |
|               |                     | Reverse   | AGGGTGCCATTCTGTTCAGG   |
| <i>XBPIs</i>  | <i>Homo Sapiens</i> | Forward   | GCTGAGTCCGCAGCAGGT     |
|               |                     | Reverse   | CTGGGTCCAAGTTGTCCAGAAT |

65 Table S1. The primers used in this study.
